# Supplementary material for: Effects of Aerobic Exercise in the Intensive Care Unit on Patient-Reported Physical Function and Mental Health Outcomes in Severely Burned Children—A Multicenter Prospective Randomized Trial
Source: MDPI journal article supplement (doi:10.3390/jpm13030455), 2023-02-28
Supplement: s1 [file s1]

**Supplementary Figure S1.** Surveys administered at admission and at discharge to collect information on patient-reported physical and mental health outcomes.

**Pre-Exercise Survey**

Research Code Number/ID:

Date/Time:

Circle one:        UE        LE

Circle one:        Early ICU        DC

Please respond to each item by marking one box per row.

|                                         | Never                         | Almost<br>Never               | Sometim<br>es                 | Often                         | Almost<br>Always              |
|-----------------------------------------|-------------------------------|-------------------------------|-------------------------------|-------------------------------|-------------------------------|
| I had trouble sleeping when I had pain. | <input type="checkbox"/><br>0 | <input type="checkbox"/><br>1 | <input type="checkbox"/><br>2 | <input type="checkbox"/><br>3 | <input type="checkbox"/><br>4 |
| I hurt a lot.                           | <input type="checkbox"/><br>0 | <input type="checkbox"/><br>1 | <input type="checkbox"/><br>2 | <input type="checkbox"/><br>3 | <input type="checkbox"/><br>4 |
| I felt unhappy.                         | <input type="checkbox"/><br>0 | <input type="checkbox"/><br>1 | <input type="checkbox"/><br>2 | <input type="checkbox"/><br>3 | <input type="checkbox"/><br>4 |
| I felt weak.                            | <input type="checkbox"/><br>0 | <input type="checkbox"/><br>1 | <input type="checkbox"/><br>2 | <input type="checkbox"/><br>3 | <input type="checkbox"/><br>4 |
| I got tired easily.                     | <input type="checkbox"/><br>0 | <input type="checkbox"/><br>1 | <input type="checkbox"/><br>2 | <input type="checkbox"/><br>3 | <input type="checkbox"/><br>4 |
| I felt sad.                             | <input type="checkbox"/><br>0 | <input type="checkbox"/><br>1 | <input type="checkbox"/><br>2 | <input type="checkbox"/><br>3 | <input type="checkbox"/><br>4 |

## Post-Exercise Survey

Research Code Number/ID:

Date/Time:

Circle one:        UE        LE

Circle one:        Early ICU        DC

Please respond to each item by marking one box per row.

During the exercise session. . . .

|                     | Never                         | Almost<br>Never               | Sometime<br>s                 | Often                         | Almost<br>Always              |
|---------------------|-------------------------------|-------------------------------|-------------------------------|-------------------------------|-------------------------------|
| I hurt a lot.       | <input type="checkbox"/><br>0 | <input type="checkbox"/><br>1 | <input type="checkbox"/><br>2 | <input type="checkbox"/><br>3 | <input type="checkbox"/><br>4 |
| I felt weak.        | <input type="checkbox"/><br>0 | <input type="checkbox"/><br>1 | <input type="checkbox"/><br>2 | <input type="checkbox"/><br>3 | <input type="checkbox"/><br>4 |
| I got tired easily. | <input type="checkbox"/><br>0 | <input type="checkbox"/><br>1 | <input type="checkbox"/><br>2 | <input type="checkbox"/><br>3 | <input type="checkbox"/><br>4 |
